# Supplementary material for: The incorporation of heterovalent copper-oxo and copper-halide clusters for the fabrication of three porous cluster organic frameworks: syntheses, structures and iodine adsorption/release study
Source: Royal Society of Chemistry journal article supplement (doi:10.1039/c9ce01745c), 2019-12-20
Supplement: c9ce01745c1.pdf [file c9ce01745c1.pdf]

## *Supporting Information*

---

# **Incorporation of heterovalent copper-oxo and copper-halide clusters for fabrication of three porous cluster organic frameworks: syntheses, structures and iodine adsorption/release study**

Jin-Hua Liu,<sup>a</sup> Jing Zhang,<sup>a</sup> Dan Zhao,<sup>b</sup> Li-Dan Lin,<sup>a</sup> Yan-Qiong Sun,<sup>a</sup> Xin-Xiong Li<sup>a\*</sup> and Shou-Tian Zheng<sup>a\*</sup>

<sup>a</sup>State Key Laboratory of Photocatalysis on Energy and Environment, College of Chemistry, Fuzhou University,

Fuzhou, Fujian 350108, China. E-mail: lxx@fzu.edu.cn; stzheng@fzu.edu.cn.

<sup>b</sup>Fuqing Branch of Fujian Normal University, Fuqing, Fujian 350300, China.

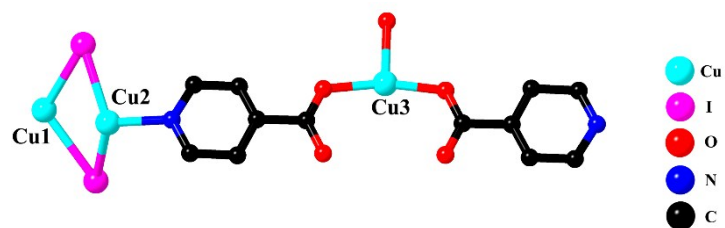

Fig. S1 The asymmetric unit of **1**.

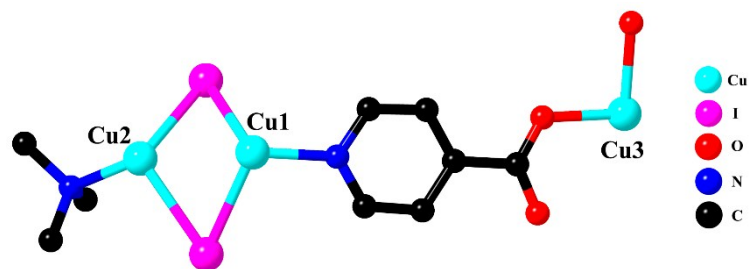

Fig. S2 The asymmetric unit of **2**.

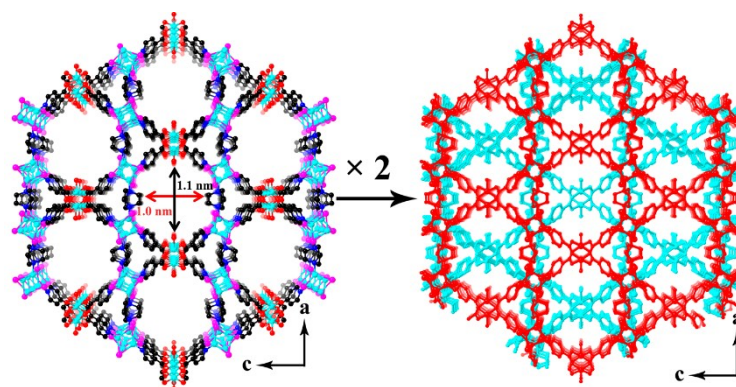

Fig. S3 View of the channels of the framework of **2** along *b* axis.

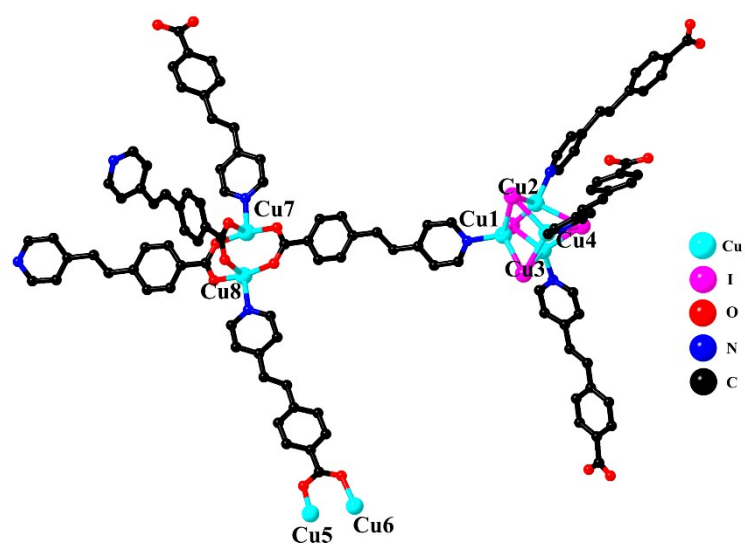

Fig. S4 The asymmetric unit of **3**.

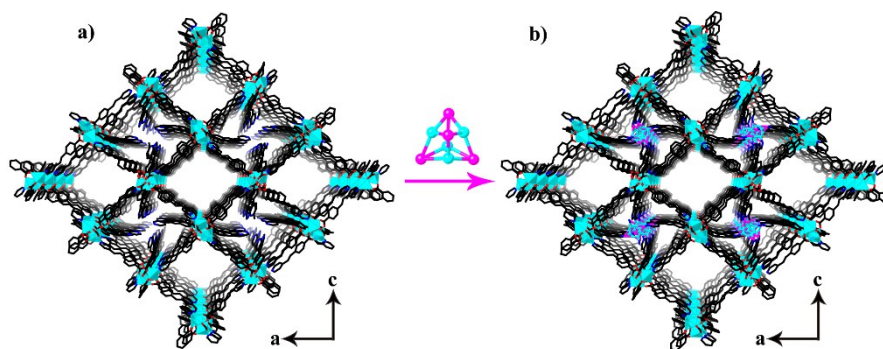

**Fig. S5** a) View of the framework based on  $\text{Cu}_2(\text{CO}_2)_4$  clusters and  $\text{PVBA}^-$  bridges. b) View of the framework of **3**.

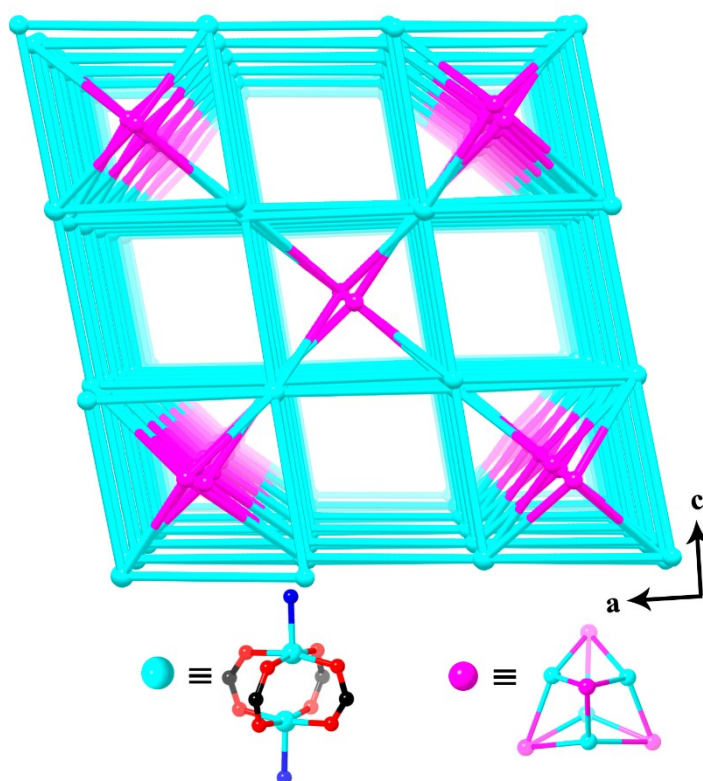

**Fig. S6** The topological representation of the 3D framework of **3** along the  $b$  axis.

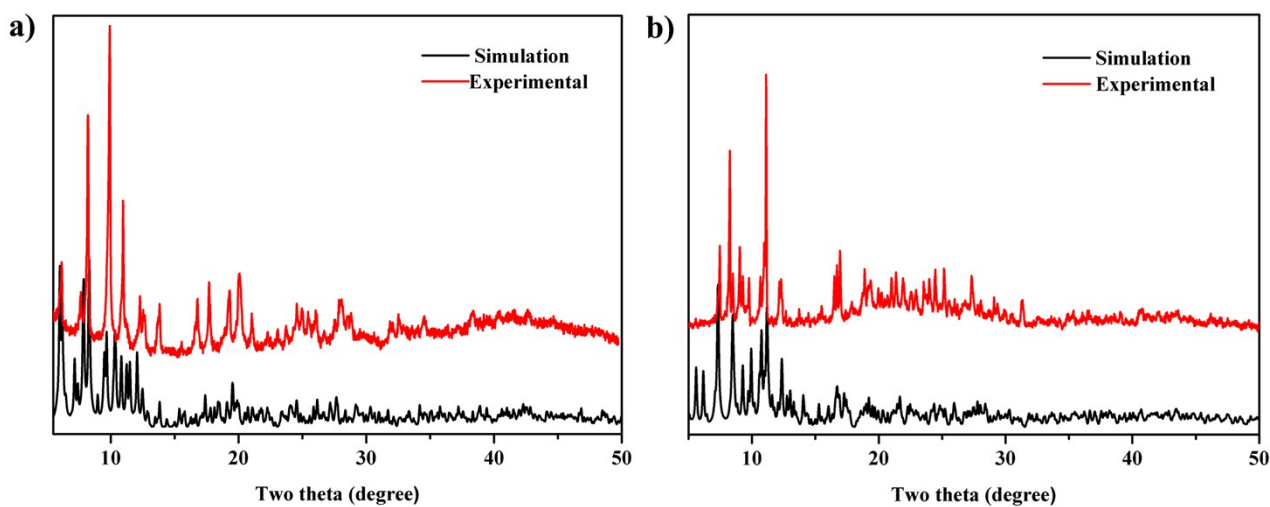

Fig. S7 Powder XRD patterns for 1 a) and 3 b).

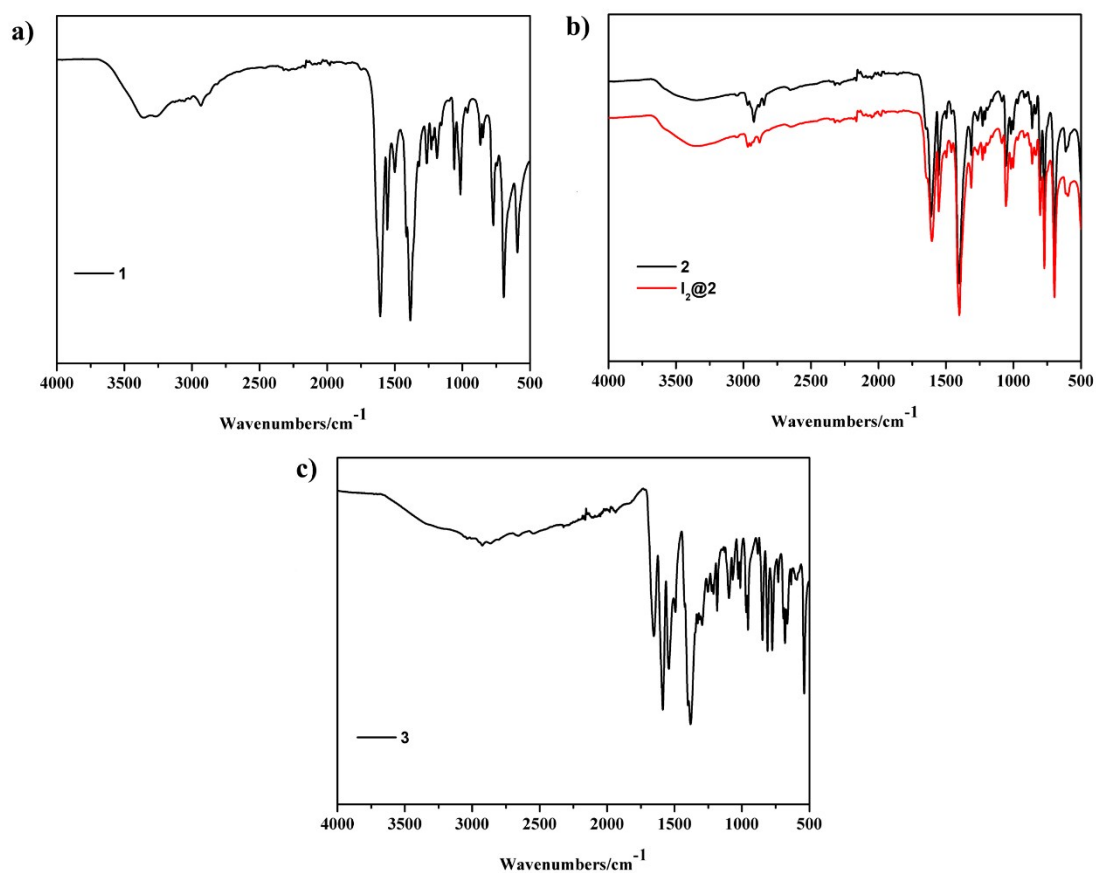

Fig. S8 IR spectra for 1-3.

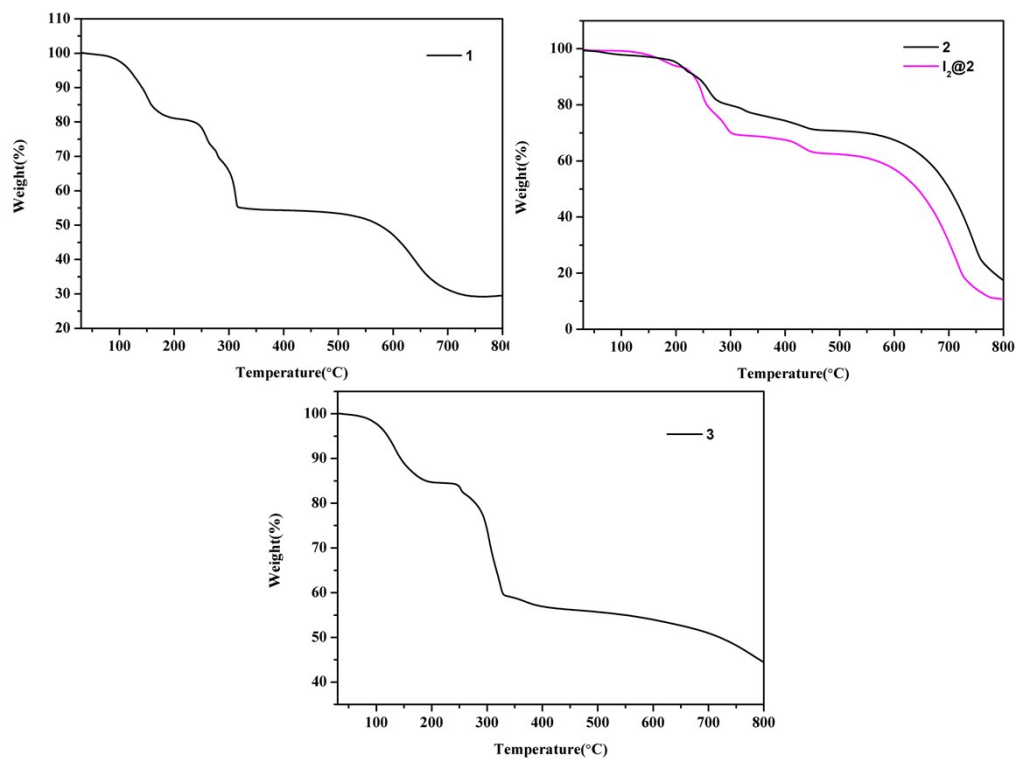

**Fig. S9** TGA curves for **1-3**.

Thermal gravimetric (TG) analysis was carried out in flowing N<sub>2</sub> with a heating rate of 10 °C min<sup>-1</sup> in the temperature range 30-800 °C to check the thermal stability of **1-3**. Three distinct weight loss stages are observed on the TGA curve of **1** and **3**. The first step weight loss (20 % for **1** and 15% for **3**) in the temperature range ca. 82-200 °C and 84-177 °C, corresponds to the removal of disordered solvent molecules (DMA and EDF for **1** and DMF for **3**), respectively. The remainder two stages weight loss in the temperature range ca. 242-800 °C and 250-800 °C are attributed to the collapse of structure. The TG curve of **2** displays two stages of continuous weight loss. The first weight loss is 18 % from 196-270 °C, corresponding to the disordered DMA molecules. The second weight loss in the temperature range ca. 558-800 °C is attributed to the collapse of structure (Fig. S9).

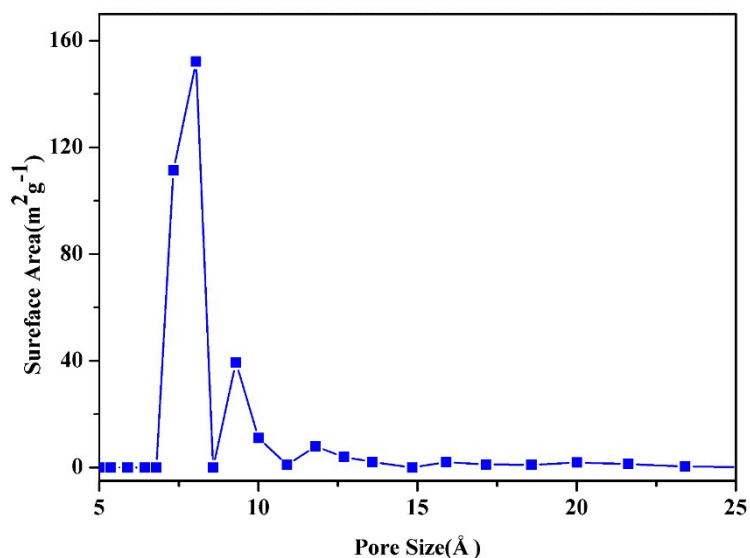

**Fig. S10** The pore size distribution of **2**.

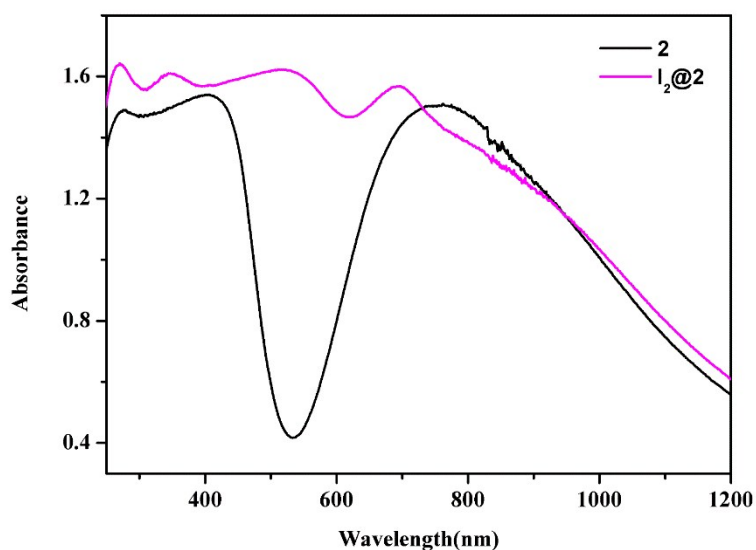

Fig. S11 Solid-state UV-Vis absorption spectra of **2** and I<sub>2</sub>@**2**.

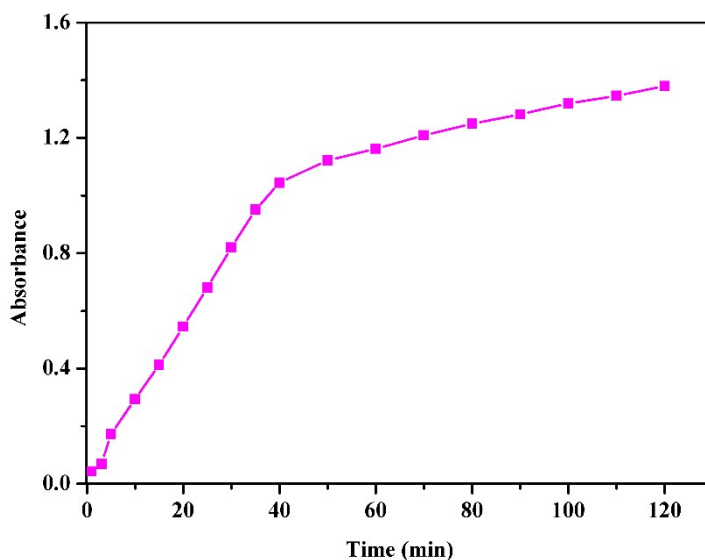

Fig. S12 The release rate of I<sub>2</sub>@**2** (monitored at 202 nm).

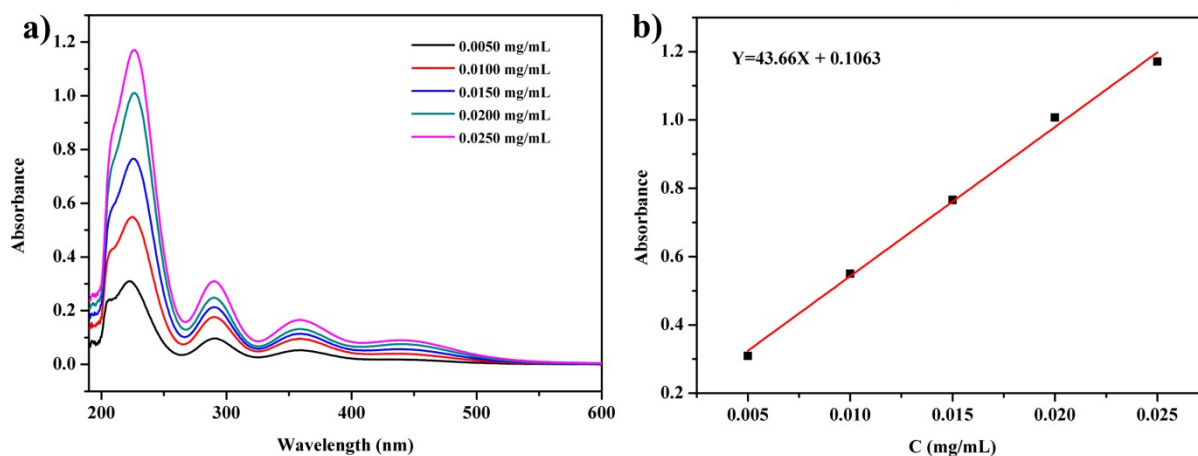

Fig. S13 a) Calibration plot of standard iodine determined by UV/vis spectra in CH<sub>3</sub>OH solution. b) The fitting Abs value vs concentration of I<sub>2</sub> with the relatively good linearity satisfies Lambert-Beer Law.
